# Supplementary material for: The genetic variation rs12143842 in NOS1AP increases idiopathic ventricular tachycardia risk in Chinese Han populations
Source: PubMed Central journal article supplement (PMC5567283; doi:10.1038/s41598-017-08548-z), 2017-08-21

**Supplementary file information**

**Article name:**

The genetic variation rs12143842 in NOS1AP increases idiopathic ventricular tachycardia risk in Chinese Han populations

**Journal name:**

*Scientific reports*

**Authors' names:**

Ronfeng Zhang Feifei Chen Honjiu Yu Lianjun Gao Xiaomeng Yin Yingxue Dong Yanzong Yang Yunlong Xia

**Corresponding address:**

Yunlong Xia, MD  
First Affiliated Hospital of Dalian Medical University,  
Dalian, Liaoning 116011  
PR China  
E-mail: yunlong\_xia@126.com

Yanzong Yang, MD  
First Affiliated Hospital of Dalian Medical University,  
Dalian, Liaoning 116011  
PR China  
E-mail: yyzheart@126.com

**Supplementary Table 1** Genotypic distribution of SNP rs12143842 genotypes in the GeneID study population

|     | Characteristic<br>(case/control) | Genotype (case) |     |     | Genotype (control) |     |     | HWE $P^a$ |
|-----|----------------------------------|-----------------|-----|-----|--------------------|-----|-----|-----------|
|     |                                  | C/C             | T/C | T/T | C/C                | T/C | T/T |           |
|     | Total                            | 280             | 210 | 46  | 611                | 644 | 160 | 0.949     |
| IVT | North                            | 143             | 114 | 20  | 310                | 331 | 87  | 0.883     |
|     | South                            | 137             | 96  | 26  | 301                | 313 | 73  | 0.808     |

HWE, Hardy-Weinberg equilibrium; IVT, idiopathic ventricular tachycardia

<sup>a</sup>HWE  $P < 0.05$  denotes the deviation from Hardy-Weinberg Equilibrium

**Supplementary Table 2** Compare with allele/genotype frequencies for rs12143842 in all East Asian populations and in the study cohorts

| Frequencies (%)    | East Asian Cohort <sup>&amp;</sup> | Study Cohort   | $P$   |
|--------------------|------------------------------------|----------------|-------|
| Allele (C/T)       | 65.9/34.1                          | 67.7/32.3      | >0.05 |
| Genotype(CC/CT/TT) | 42.9/46.0/11.1                     | 42.4/40.5/17.3 | >0.05 |

&: allele/genotype frequencies data for rs12143842 in all East Asian populations was from

<http://www.ensembl.org/>

Supplementary Figure 1 The linkage disequilibrium(LD) pattern of NOS1AP including rs12143842 from CHB and CHS populations

CHB

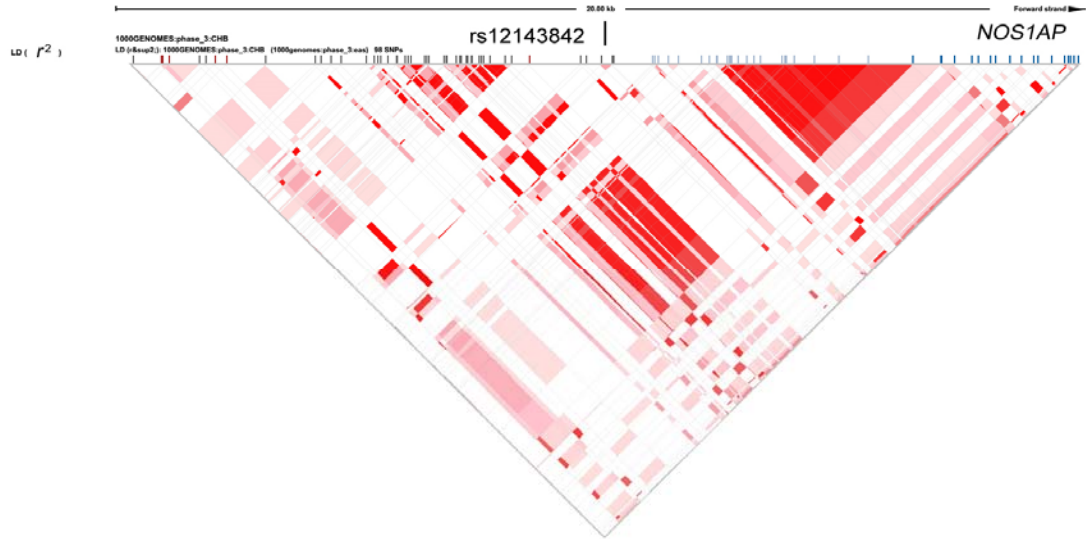

CHS

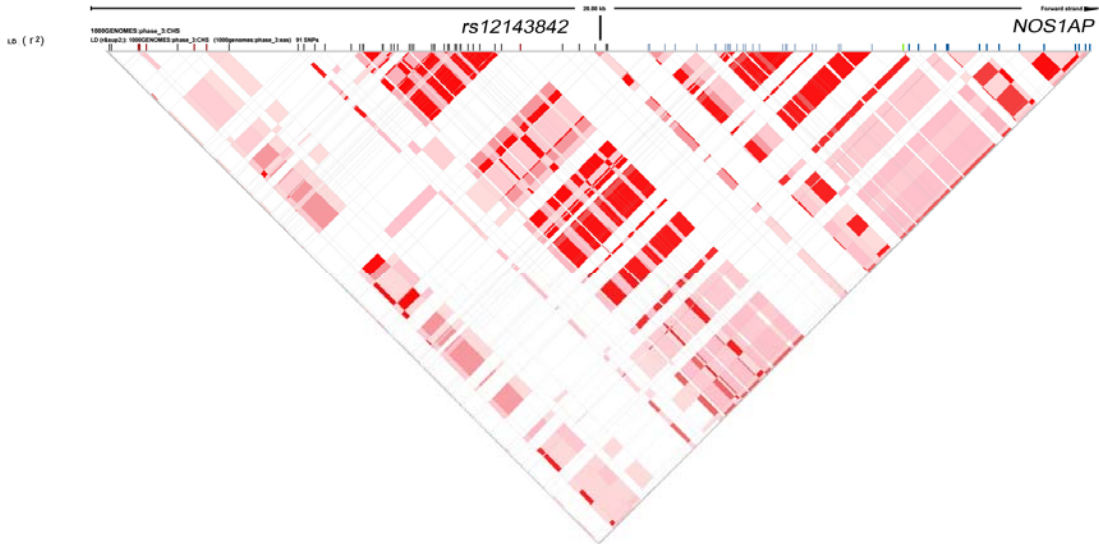

Supplement: 41598_2017_8548_MOESM1_ESM.pdf [file 41598_2017_8548_MOESM1_ESM.pdf]
